# Supplementary material for: Whole-genome sequencing of single circulating tumor cells from neuroendocrine neoplasms
Source: PubMed Central journal article supplement (PMC8428071; doi:10.1530/erc-21-0179), 2021-07-16

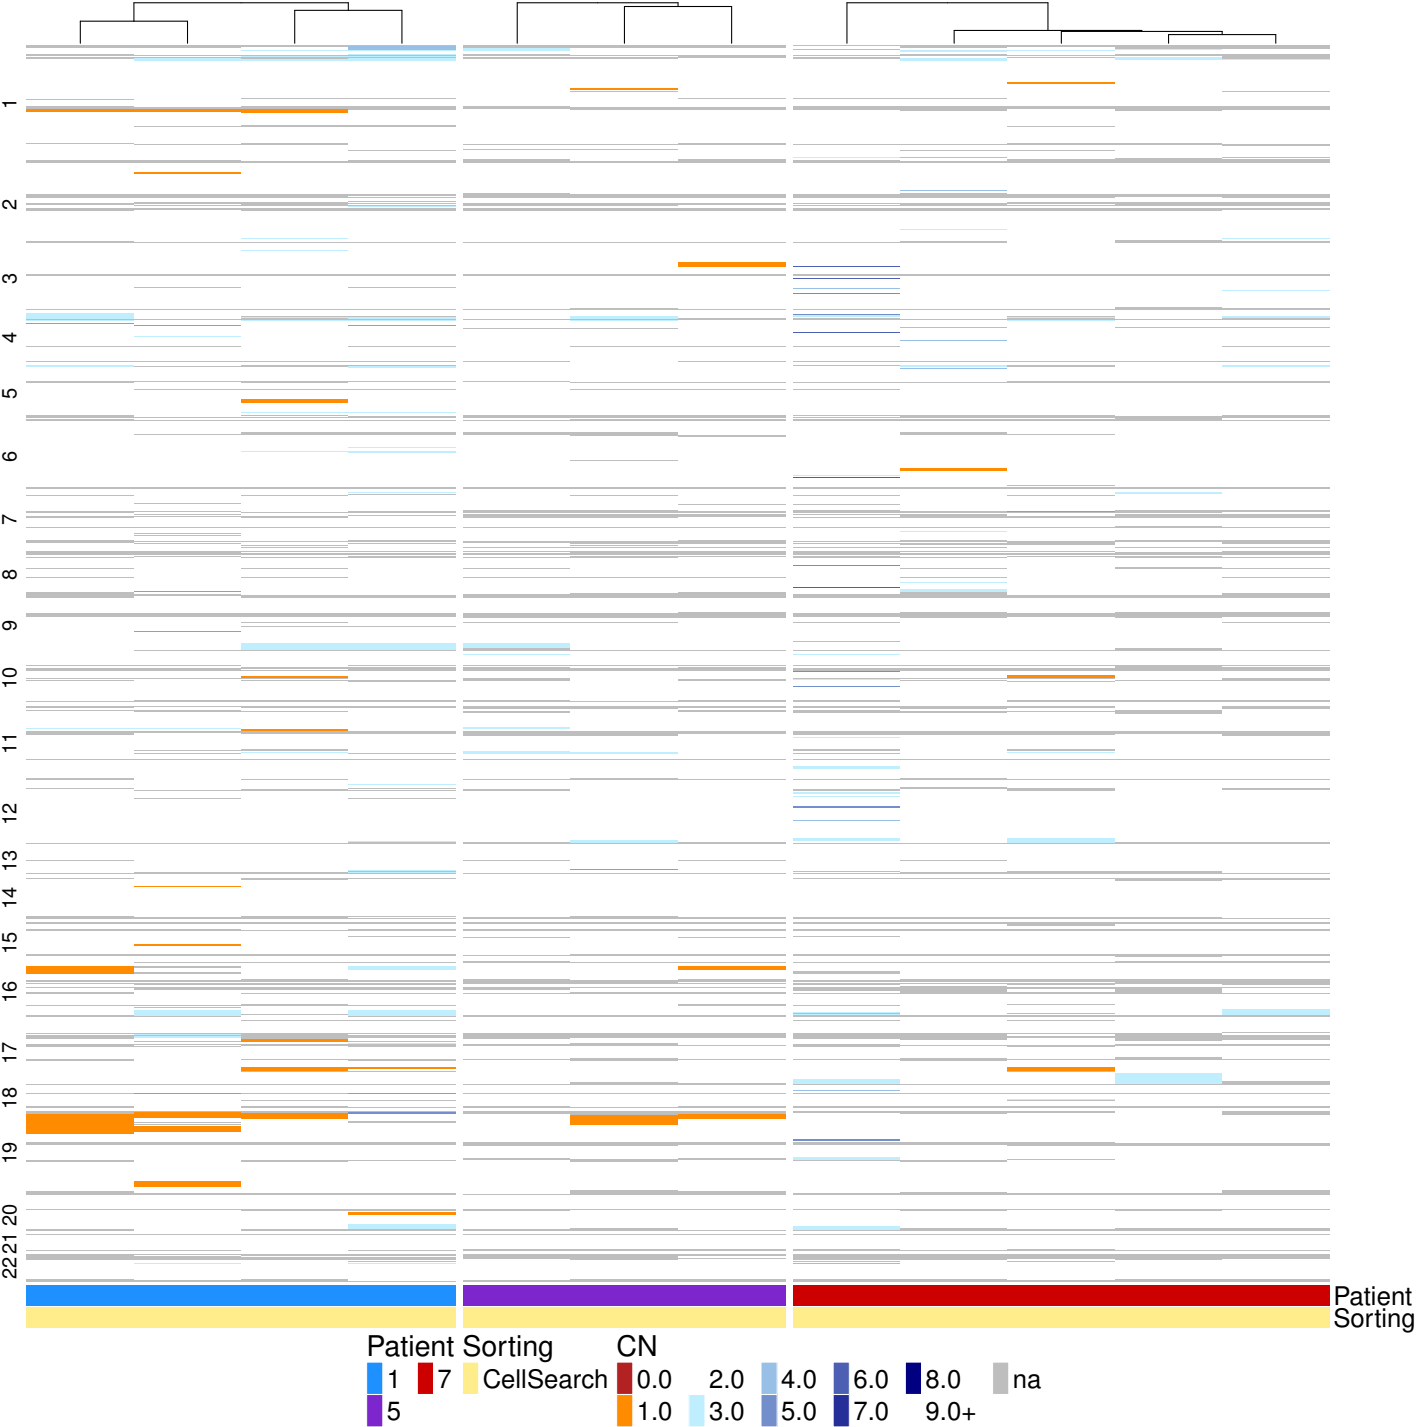

Supplement: supplementary_figure_1.pdf [file supplementary_figure_1.pdf]
